# Supplementary material for: A new family of decanuclear Ln7Cr3 clusters exhibiting a magnetocaloric effect
Source: Royal Society of Chemistry journal article supplement (doi:10.1039/d1ra02734d), 2021-01-01
Supplement: d1ra02734d1.pdf [file d1ra02734d1.pdf]

## Supporting Information

### A New Family of Decanuclear $\text{Ln}_7\text{Cr}_3$ Clusters Exhibiting Magnetocaloric Effect

Jia-Jia Yin,<sup>†a</sup> Tian-Qi Lu,<sup>†a</sup> Cheng Chen,<sup>a</sup> Hai-Yan Shi,<sup>b</sup> Gui-Lin Zhuang,<sup>c</sup> Jun Zheng,<sup>a</sup>  
Xiaolong Fang<sup>d</sup> and Xiu-Ying Zheng<sup>\*a, b</sup>

<sup>a</sup> Institutes of Physical Science and Information Technology, Key Laboratory of Structure and Functional Regulation of Hybrid Materials of Ministry of Education, Photoelectric Conversion Energy Materials and Devices Key Laboratory of Anhui Province, Anhui University, Hefei, 230601, China.

<sup>b</sup> State Key Laboratory of Physical Chemistry of Solid Surfaces and Department of Chemistry, College of Chemistry and Chemical Engineering, Xiamen University, Xiamen, 361005, China.

<sup>c</sup> College of Chemical Engineering, Zhejiang University of Technology, Hangzhou, 310032, China.

<sup>d</sup> College of Materials and Chemical Engineering, Anhui Jianzhu University, Hefei, 230601, China.

E-mail: [xyzheng@ahu.edu.cn](mailto:xyzheng@ahu.edu.cn)

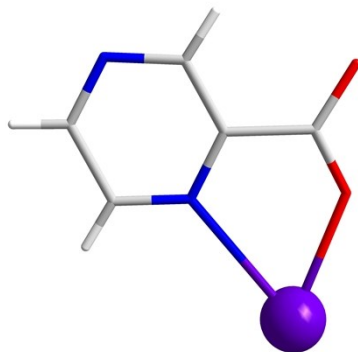

**Fig. S1** The bridging mode of the organic ligand L<sup>-</sup> in compound **1**.

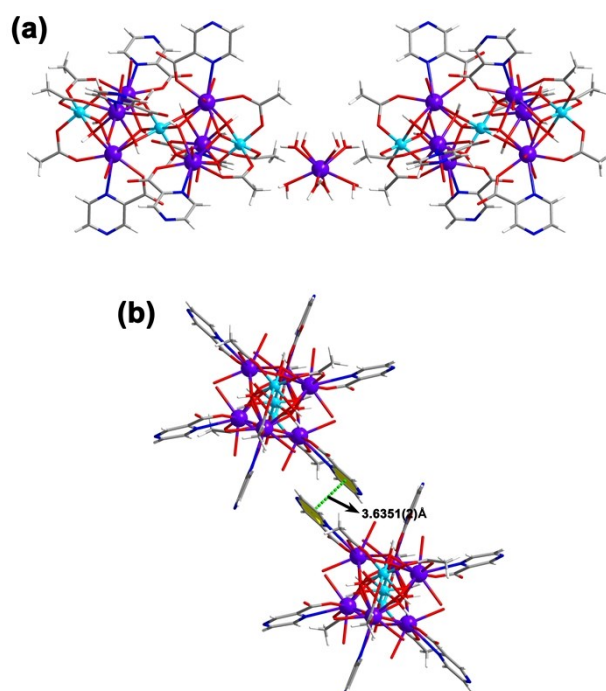

**Fig. S2** (a) The hydrogen-bond interaction between the cationic cluster core and the free mononuclear cation of  $[\text{Gd}(\text{H}_2\text{O})_8]^{3+}$ ; (b)  $\pi$ -bond interactions of the pyrazine groups on the two cationic cluster cores in compound **1**.

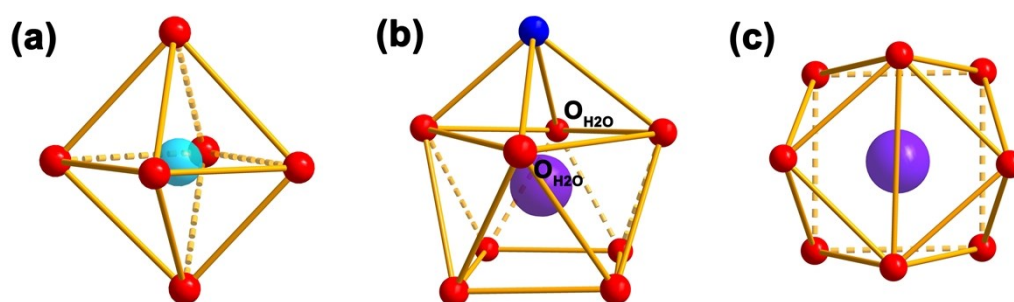

**Fig. S3** The coordination modes of  $\text{Cr}^{3+}$  (a) and  $\text{Gd}^{3+}$  ions (b, c) in **1**.

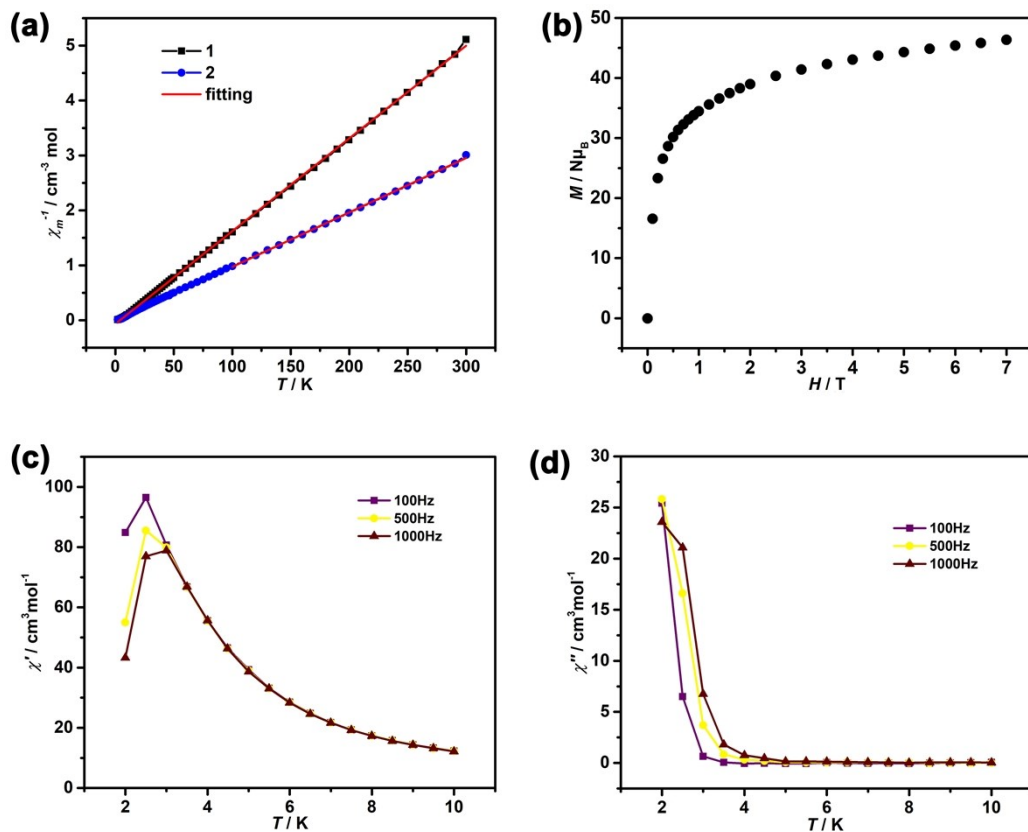

**Fig. S4** (a) The  $\chi_M T$  vs  $T$  curves of 1–2 were fitted by Curie-Weiss law; (b) the plot of magnetization for 2 at 2 K; (c) temperature dependence of the in-phase and (d) out-of phase ac susceptibilities at the indicated frequencies with  $H_{\text{dc}} = 0$  Oe for 2.

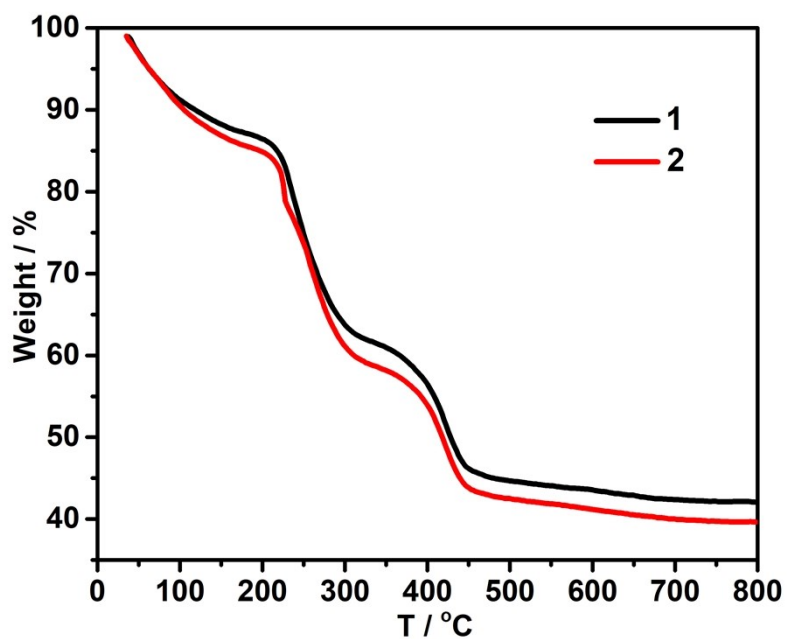

**Fig. S5** The TGA of compounds 1–2 under air atmosphere.

The TGA of compounds **1–2** were measured under air atmosphere. As shown in **Fig. S5**, the mass losses of **1–2** at 220 °C are about 15.9 % and 17.1 %, respectively, which are close to the calculated values (15.2 % for **1** and 18.5 % for **2**) for the removal of guest water molecules. As the temperature increase, the metal frameworks of **1–2** drastically collapse. The final residues of **1–2** (41.8 % and 39.5 %) is slightly higher than the calculated values (36.1 % and 35.2 %) based on  $\text{Ln}_2\text{O}_3$  ( $\text{Ln} = \text{Gd}/\text{Dy}$ ) and  $\text{Cr}_2\text{O}_3$ , which may be due to the formation of lanthanide oxychlorides caused by the presence of perchlorates.

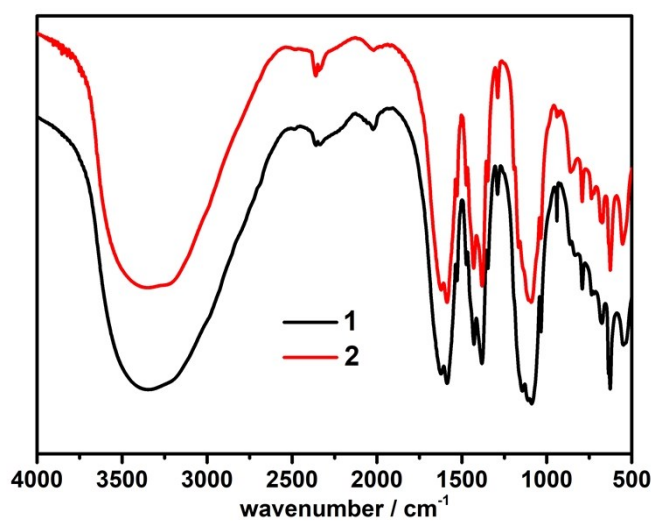

**Fig. S6** IR spectra in 500-4000  $\text{cm}^{-1}$  for compounds **1–2**.

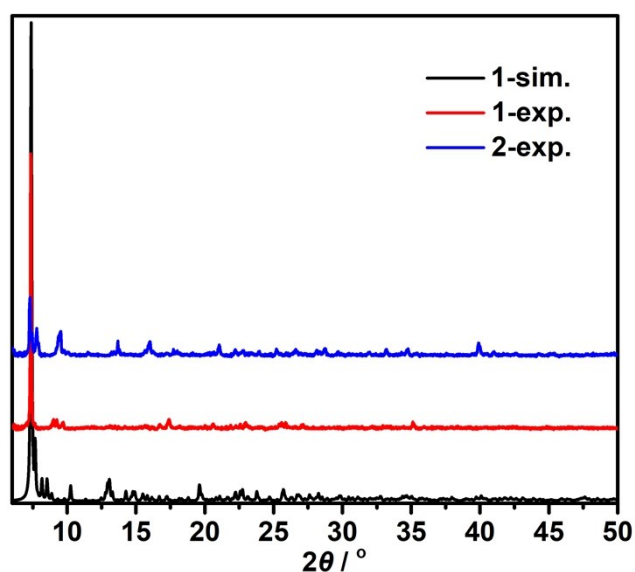

**Fig. S7** PXRD curve of compounds **1–2**.

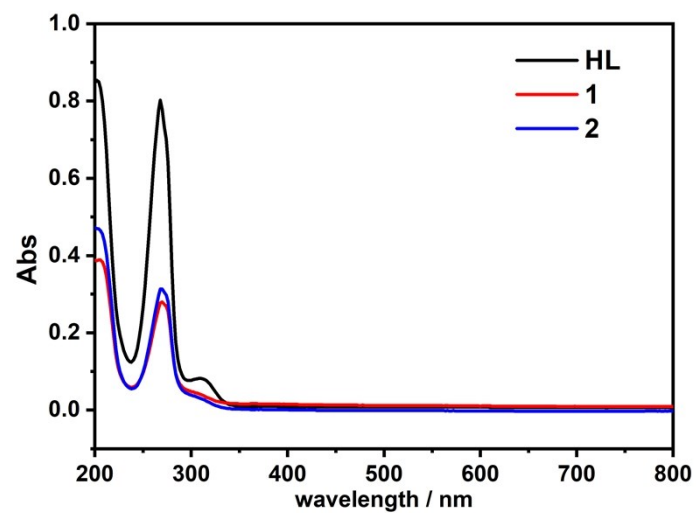

**Fig. S8** UV-Vis absorption spectra of HL and compounds **1–2**. The result indicates that the main peak at 270 nm belongs to the conjugated transition of the ligand pyrazine ring  $\pi-\pi^*$ .

**Table S1.** Crystallographic Data for Compounds **1–2**.

| Compound                                         | <b>1</b>                                                                                                          | <b>2</b>                                                                                                          |
|--------------------------------------------------|-------------------------------------------------------------------------------------------------------------------|-------------------------------------------------------------------------------------------------------------------|
| Formula                                          | C <sub>42</sub> H <sub>158</sub> Cl <sub>6</sub> Cr <sub>3</sub> Gd <sub>7</sub> N <sub>12</sub> O <sub>115</sub> | C <sub>42</sub> H <sub>178</sub> Cl <sub>6</sub> Cr <sub>3</sub> Dy <sub>7</sub> N <sub>12</sub> O <sub>125</sub> |
| FW                                               | 4141.24                                                                                                           | 4358.15                                                                                                           |
| T/K                                              | 120 K                                                                                                             | 120 K                                                                                                             |
| Cry. system                                      | monoclinic                                                                                                        | monoclinic                                                                                                        |
| Space group                                      | <i>C2/c</i>                                                                                                       | <i>C2/c</i>                                                                                                       |
| a /Å                                             | 13.9210(14)                                                                                                       | 13.9146(3)                                                                                                        |
| b /Å                                             | 23.943(2)                                                                                                         | 23.8777(4)                                                                                                        |
| c /Å                                             | 41.288(4)                                                                                                         | 41.1868(8)                                                                                                        |
| $\alpha$ /°                                      | 90                                                                                                                | 90                                                                                                                |
| $\beta$ /°                                       | 96.278(7)                                                                                                         | 96.592(2)                                                                                                         |
| $\gamma$ /°                                      | 90                                                                                                                | 90                                                                                                                |
| V /Å <sup>3</sup>                                | 13679.0(2)                                                                                                        | 13593.8(5)                                                                                                        |
| Z                                                | 4                                                                                                                 | 4                                                                                                                 |
| Dc/g cm <sup>-3</sup>                            | 2.011                                                                                                             | 2.129                                                                                                             |
| $\mu$ /mm <sup>-1</sup>                          | 25.652                                                                                                            | 24.400                                                                                                            |
| Data/parameters                                  | 12189/559                                                                                                         | 12021/658                                                                                                         |
| 2 $\theta$ /°                                    | 7.378–140.032                                                                                                     | 12.484–138.96                                                                                                     |
| Obs. reflections                                 | 25396                                                                                                             | 24173                                                                                                             |
| F (000)                                          | 8144.0                                                                                                            | 8600.0                                                                                                            |
| GOF                                              | 1.129                                                                                                             | 1.059                                                                                                             |
| R <sub>1</sub> [I > 2 $\sigma$ (I)] <sup>a</sup> | 0.0979                                                                                                            | 0.0649                                                                                                            |
| wR <sub>2</sub> (All data) <sup>b</sup>          | 0.2965                                                                                                            | 0.1840                                                                                                            |

$$^a R_1 = \frac{\sum ||F_o| - |F_c||}{\sum |F_o|}; \quad ^b wR_2 = \left\{ \frac{\sum [w(F_o^2 - F_c^2)^2]}{\sum [w(F_o^2)^2]} \right\}^{1/2}$$

**Table S2.** Selected bond distances (Å) and band angles (°) of **1**.

|                          |           |                                        |           |
|--------------------------|-----------|----------------------------------------|-----------|
| Gd1-O1                   | 2.399(11) | Gd3-O12                                | 2.386(10) |
| Gd1-O1W                  | 2.389(10) | Gd3-O13 <sup>1</sup>                   | 2.460(8)  |
| Gd1-O2W                  | 2.453(10) | Gd3-O15                                | 2.428(8)  |
| Gd1-O8                   | 2.374(10) | Gd3-O16                                | 2.459(9)  |
| Gd1-O14                  | 2.449(8)  | Gd3-O18                                | 2.434(9)  |
| Gd1-O15                  | 2.475(8)  | Cr1-O13 <sup>1</sup>                   | 1.986(8)  |
| Gd1-O16                  | 2.434(8)  | Cr1-O13                                | 1.986(8)  |
| Gd2-O3                   | 2.385(11) | Cr1-O14 <sup>1</sup>                   | 1.989(8)  |
| Gd2-O3W                  | 2.427(10) | Cr1-O14                                | 1.989(8)  |
| Gd2-O4W                  | 2.438(11) | Cr1-O15                                | 1.981(8)  |
| Gd2-O10                  | 2.337(11) | Cr1-O15 <sup>1</sup>                   | 1.981(8)  |
| Gd2-O13 <sup>1</sup>     | 2.441(8)  | Cr2-O7                                 | 1.978(11) |
| Gd2-O14                  | 2.469(8)  | Cr2-O9                                 | 2.013(11) |
| Gd2-O17                  | 2.429(9)  | Cr2-O11                                | 1.959(11) |
| <hr/>                    |           |                                        |           |
| O1-Gd1-O15               | 78.3(3)   | O5-Gd3-O15                             | 78.3(3)   |
| O1-Gd1-O16               | 141.6(3)  | O5-Gd3-O16                             | 143.0(3)  |
| O1-Gd1-O17               | 141.6(3)  | O5-Gd3-O18                             | 139.5(3)  |
| O1W-Gd1-O1               | 82.5(3)   | O16-Gd3-O13 <sup>1</sup>               | 101.0(3)  |
| O1W-Gd1-O16              | 135.0(3)  | O18-Gd3-O13 <sup>1</sup>               | 67.1(3)   |
| O1W-Gd1-O17              | 72.2(3)   | O13-Cr1-O14 <sup>1</sup>               | 82.4(3)   |
| O2W-Gd1-O15              | 76.3(3)   | O13 <sup>1</sup> -Cr1-O14              | 82.4(3)   |
| O2W-Gd1-O17              | 136.8(3)  | O13 <sup>1</sup> -Cr1-O14 <sup>1</sup> | 97.6(3)   |
| O8-Gd1-O1                | 130.2(4)  | O16-Cr2-O9                             | 177.3(4)  |
| O8-Gd1-O1W               | 80.5(3)   | O17-Cr2-O7                             | 94.4(4)   |
| O3-Gd2-O13 <sup>1</sup>  | 79.7(3)   | O17-Cr2-O9                             | 92.6(4)   |
| O3-Gd2-O14               | 78.4(3)   | O7W-Gd4-O7W <sup>2</sup>               | 131.7(8)  |
| O3W-Gd2-O4W              | 138.4(4)  | O7W-Gd4-O8W <sup>2</sup>               | 74.4(6)   |
| O3W-Gd2-O13 <sup>1</sup> | 136.7(3)  | O7W-Gd4-O10W <sup>2</sup>              | 76.7(6)   |
| O3W-Gd2-O14              | 74.4(3)   | O9W-Gd4-O8W                            | 69.7(6)   |

Symmetry code: <sup>1</sup>1-X,1-Y,1-Z; <sup>2</sup>1-X,+Y,3/2-Z

**Table S3.** Selected bond distances (Å) and band angles (°) of **2**.

|                           |          |                                        |          |
|---------------------------|----------|----------------------------------------|----------|
| Dy1-O13 <sup>1</sup>      | 2.445(6) | Dy3-O16                                | 2.399(6) |
| Dy1-O15                   | 2.430(6) | Dy3-O17                                | 2.429(7) |
| Dy1-O16                   | 2.447(6) | Cr1-O13 <sup>1</sup>                   | 1.984(6) |
| Dy2-O3                    | 2.358(7) | Cr1-O13                                | 1.984(6) |
| Dy2-O3W                   | 2.428(8) | Cr1-O14 <sup>1</sup>                   | 1.979(6) |
| Dy2-O4W                   | 2.417(8) | Cr1-O15 <sup>1</sup>                   | 1.982(6) |
| Dy2-O9                    | 2.377(7) | Cr2-O7                                 | 1.983(7) |
| Dy2-O13 <sup>1</sup>      | 2.431(6) | Cr2-O10                                | 1.995(7) |
| Dy3-O5                    | 2.356(7) | Cr2-O11                                | 2.009(8) |
| O1-Dy1-O2W                | 83.5(3)  | O4W-Dy2-O13 <sup>1</sup>               | 136.0(2) |
| O1-Dy1-O13 <sup>1</sup>   | 77.1(2)  | O4W-Dy2-O14                            | 74.2(2)  |
| O1W-Dy1-O18               | 75.5(2)  | O17-Dy2-O13 <sup>1</sup>               | 101.3(2) |
| O2W-Dy1-O15               | 73.9(2)  | O17-Dy2-O3W                            | 138.5(2) |
| O8-Dy1-O1W                | 82.1(3)  | O17-Dy2-O14                            | 68.2(2)  |
| O18-Dy1-O14               | 101.5(2) | O5-Dy3-O17                             | 142.6(2) |
| O18-Dy1-O15               | 65.0(2)  | O16-Dy3-O14                            | 101.9(2) |
| O3-Dy2-O3W                | 80.3(2)  | O18-Dy3-O15                            | 68.2(2)  |
| O3-Dy2-O4W                | 81.4(2)  | O18-Dy3-O17                            | 64.9(2)  |
| O3-Dy2-O13 <sup>1</sup>   | 77.4(2)  | O14-Cr1-O13                            | 99.0(2)  |
| O3W-Dy2-O14               | 136.4(2) | O13 <sup>1</sup> -Cr1-O13              | 180.0(2) |
| O17-Cr2-O11               | 93.4(3)  | O14 <sup>1</sup> -Cr1-O13              | 81.0(2)  |
| O17-Cr2-O16               | 83.8(3)  | O7-Cr2-O10                             | 88.2(3)  |
| O18-Cr2-O9                | 94.7(3)  | O7-Cr2-O11                             | 89.4(3)  |
| O18-Cr2-O11               | 175.9(3) | O10-Cr2-O11                            | 88.3(3)  |
| O7W <sup>2</sup> -Dy4-O7W | 121.1(5) | O7W <sup>2</sup> -Dy4-O8W <sup>2</sup> | 74.2(4)  |
| O9W <sup>2</sup> -Dy4-O9W | 112.6(6) | O7W-Dy4-O8W <sup>2</sup>               | 72.9(4)  |

Symmetry code: <sup>1</sup>1-X,1-Y,1-Z; <sup>2</sup>1-X,+Y,1/2-Z



**Table S4.** The CShM (Continuous Shape Measures) values of Ln1/Ln4 in compounds **1–2**.

| Com. <sup>b</sup><br>Refcode <sup>a</sup> | <b>1</b><br>Gd1/Gd4   | <b>2</b><br>Dy1/Dy4   |
|-------------------------------------------|-----------------------|-----------------------|
| EP-9                                      | 24.061/28.768         | 23.936/28.205         |
| OPY-9                                     | 25.182/24.423         | 25.417/22.572         |
| HBPY-9                                    | 27.906/28.016         | 28.096/27.636         |
| JTC-9                                     | 23.497/25.556         | 23.375/24.646         |
| JCCU-9                                    | 16.864/16.751         | 16.897/15.557         |
| CCU-9                                     | 21.298/17.010         | 21.362/15.957         |
| JCSAPR-9                                  | <b>15.376</b> /22.564 | <b>15.481</b> /23.486 |
| CSAPR-9                                   | 18.633/22.631         | 18.768/23.844         |
| JTCTPR-9                                  | 15.993/ <b>11.047</b> | 16.022/ <b>10.355</b> |
| TCTPR-9                                   | 20.434/15.644         | 20.588/14.177         |
| JTDIC-9                                   | 25.474/12.705         | 25.420/12.377         |
| HH-9                                      | 23.854/24.677         | 23.825/23.962         |
| MFF-9                                     | 18.061/23.985         | 18.182/24.540         |

<sup>a</sup> EP-9, Enneagon; OPY-9, Octagonal pyramid; HBPY-9, Heptagonal bipyramid; JTC-9, Johnson triangular cupola; JCCU-9, Capped cube; CCU-9, Spherical-relaxed capped cube; JCSAPR-9, Capped square antiprism; CSAPR-9, Spherical capped square antiprism; JTCTPR-9, Tricapped trigonal prism; TCTPR-9, Spherical tricapped trigonal prism; JTDIC-9, Tridiminished icosahedron; HH-9, Hula-hoop; MFF-9, Muffin. <sup>b</sup> Two lanthanide ions in each asymmetric unit of **1–2**.

The total Hamilton operator of **1** in QMC simulation is presented as follow:

$$\begin{aligned}
 H = & -\mathbf{J}_1^*[(S_{Gd1}S_{Gd2} + S_{Gd2}S_{Gd3} + S_{Gd1}S_{Gd3} + S_{Gd4}S_{Gd5} + S_{Gd4}S_{Gd6} + S_{Gd5}S_{Gd6})] - \\
 & \mathbf{J}_2^*[(S_{Gd1}S_{Cr1} + S_{Gd2}S_{Cr1} + S_{Gd3}S_{Cr1} + S_{Gd1}S_{Cr2} + S_{Gd2}S_{Cr2} + S_{Gd3}S_{Cr2} + S_{Gd4}S_{Cr2} + S_{Gd5}S_{Cr2} \\
 & + S_{Gd6}S_{Cr2} + S_{Gd4}S_{Cr3} + S_{Gd5}S_{Cr3} + S_{Gd6}S_{Cr3})] + \mathbf{D}_1^*[(S_{Z(Gd1)}S_{Z(Gd1)} + S_{Z(Gd2)}S_{Z(Gd2)}) + \\
 & S_{Z(Gd3)}S_{Z(Gd3)} + S_{Z(Gd4)}S_{Z(Gd4)} + S_{Z(Gd5)}S_{Z(Gd5)} + S_{Z(Gd6)}S_{Z(Gd6)})] + \mathbf{D}_2^*[(S_{Z(Cr1)}S_{Z(Cr1)} + \\
 & S_{Z(Cr2)}S_{Z(Cr2)} + S_{Z(Cr3)}S_{Z(Cr3)})]
 \end{aligned}$$
